# Supplementary material for: Machine Learning-based Anomaly Detection with Magnetic Data
Source: Preprints.org preprint supplement (doi:10.20944/preprints202012.0092.v1), 2020-12-04
Supplement: Supplementary file 1 [file supplementary]

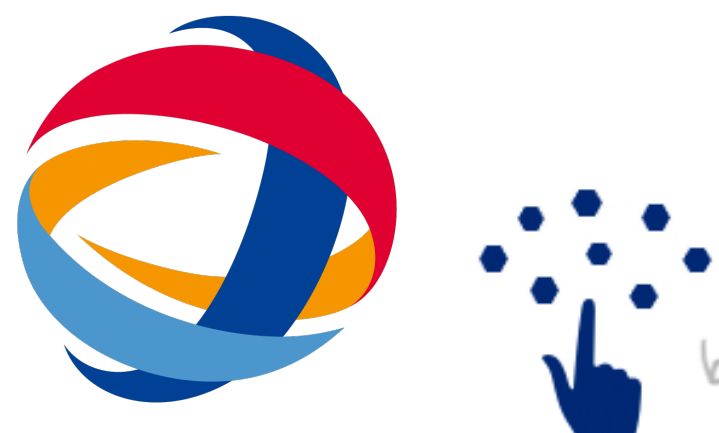

# Machine Learning-based Anomaly Detection with Magnetic Data

ML4Eng Paper

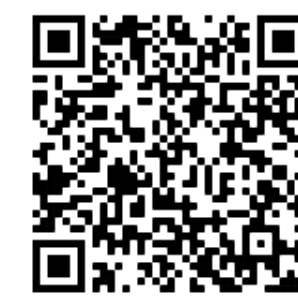

Peetak P. Mitra, Denis Akhiyarov, Mauricio Araya-Polo, Daniel Byrd

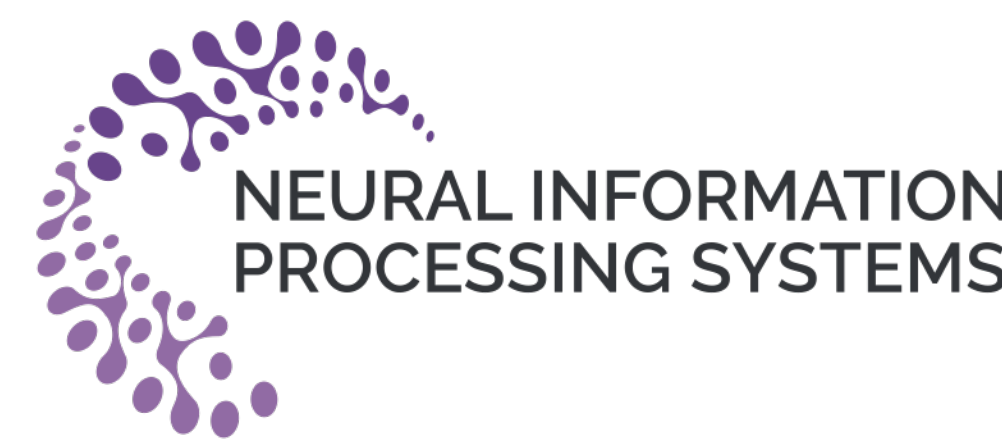

## Motivation

- Pipeline Integrity important to the energy industry
- Undetected defects can cause significant damage
- Intrusive methods cause operational challenges
- Non-intrusive magnetic methods like LSM are promising in detecting/characterizing pipeline defects
- Anomaly detection from multi-sensor, multi-alignment LSM data not trivial
- Study to explore Scalable ML methods for this task

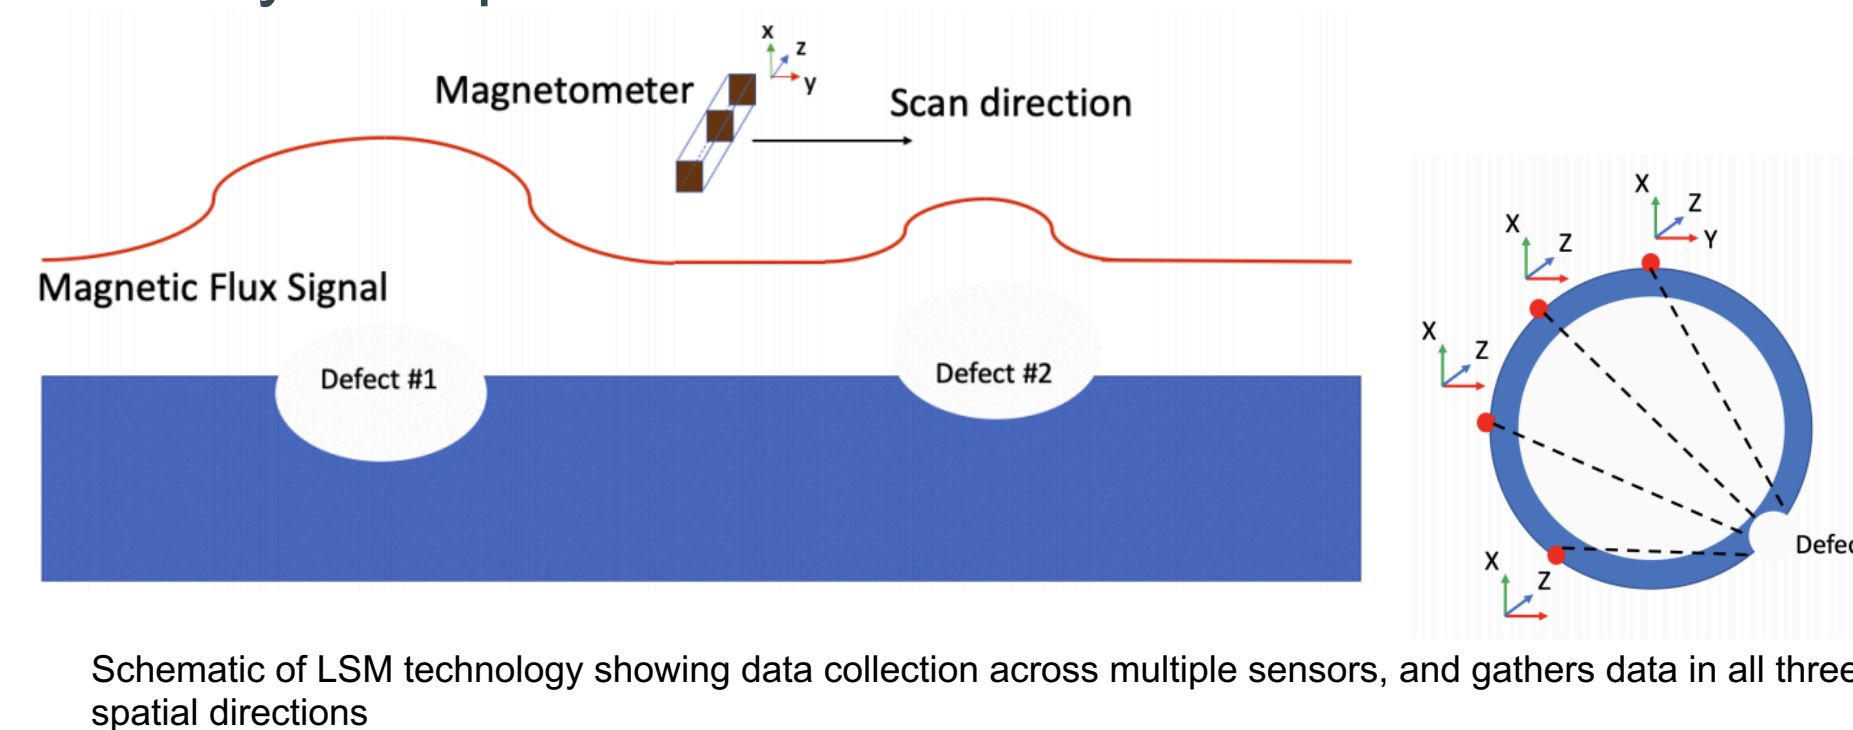

## Data and Preprocessing

- Multi-sensor LSM data are multi-modal, non-aligned sequences, that affects ML model predictions
- Fast Dynamic Time Warping algorithm re-aligns dataset with  $O(N)$  time and space complexity

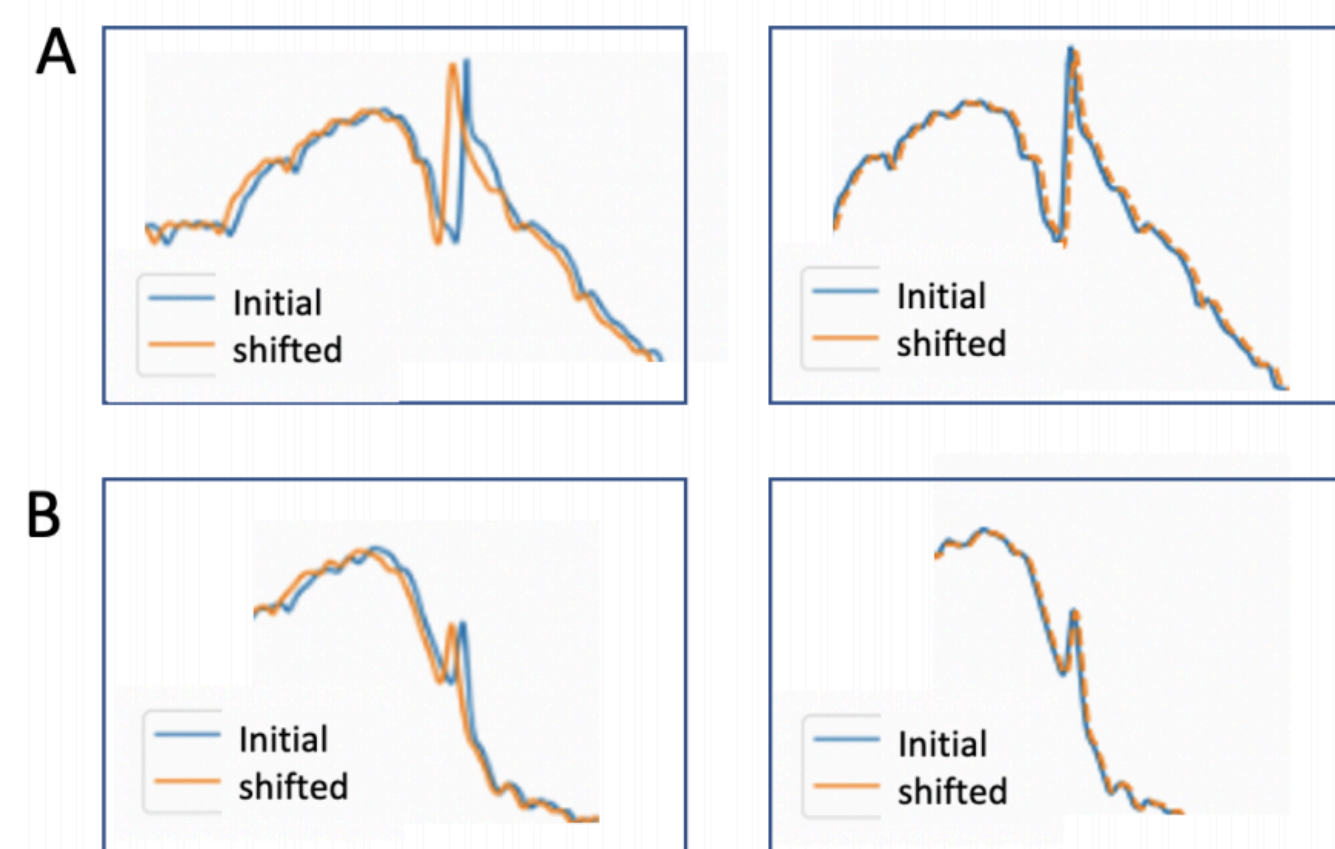

| Defect | Location | Volume | Depth | Width |
|--------|----------|--------|-------|-------|
| D1     | 2 ft     | 0.2    | 0.77  | 0.45  |
| D2     | 76 ft    | 0.6    | 0.62  | 1     |

## Customized 1D CNN for multi-output prediction

- Data leakage in random test/train split
- Masked defect regions with +/- 10 ft
- **Train samples:** 35000
- **Test samples:** 10000

- The "point-based" methods can detect defect, but not characterize them
- Sequence learning using CNN with 1D filters used to extract spatial features
- Multi-task classification used to characterize defect properties
- Concatenation operations at the spatial levels to isolate effects of different sensors
- One defect held out as test dataset

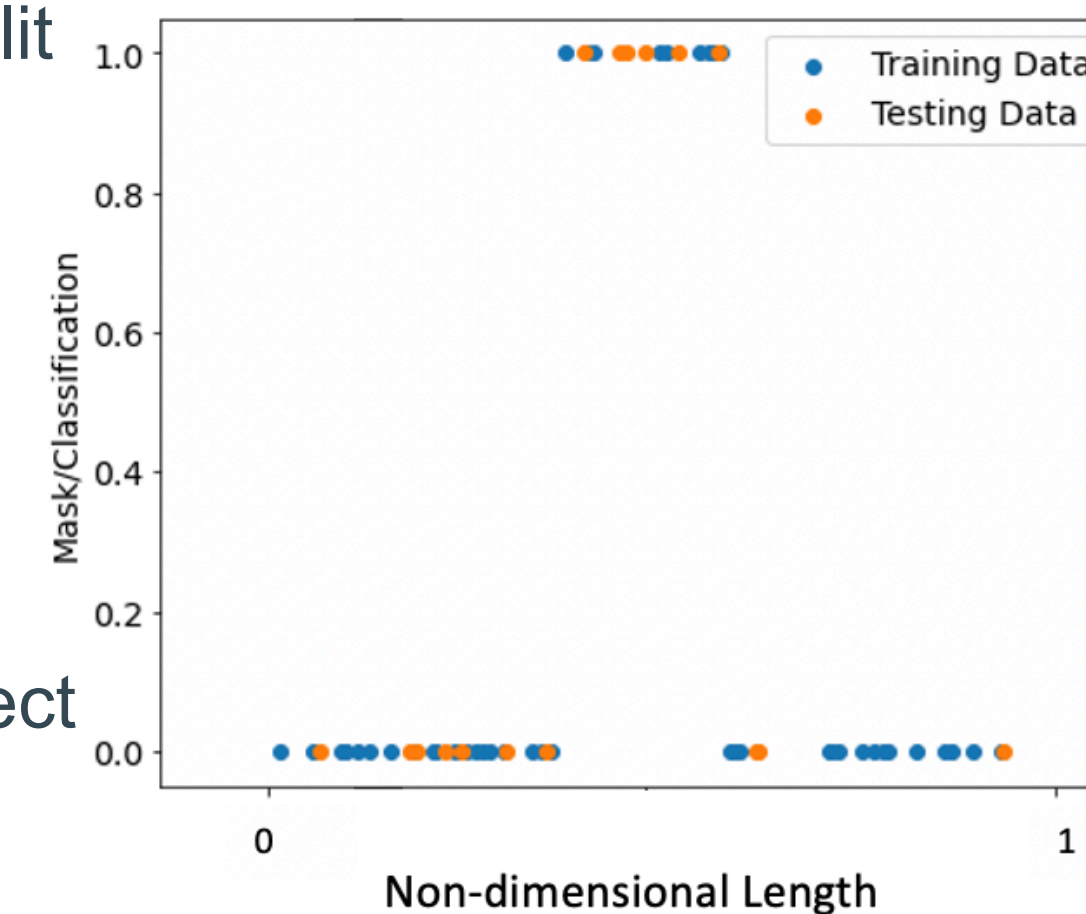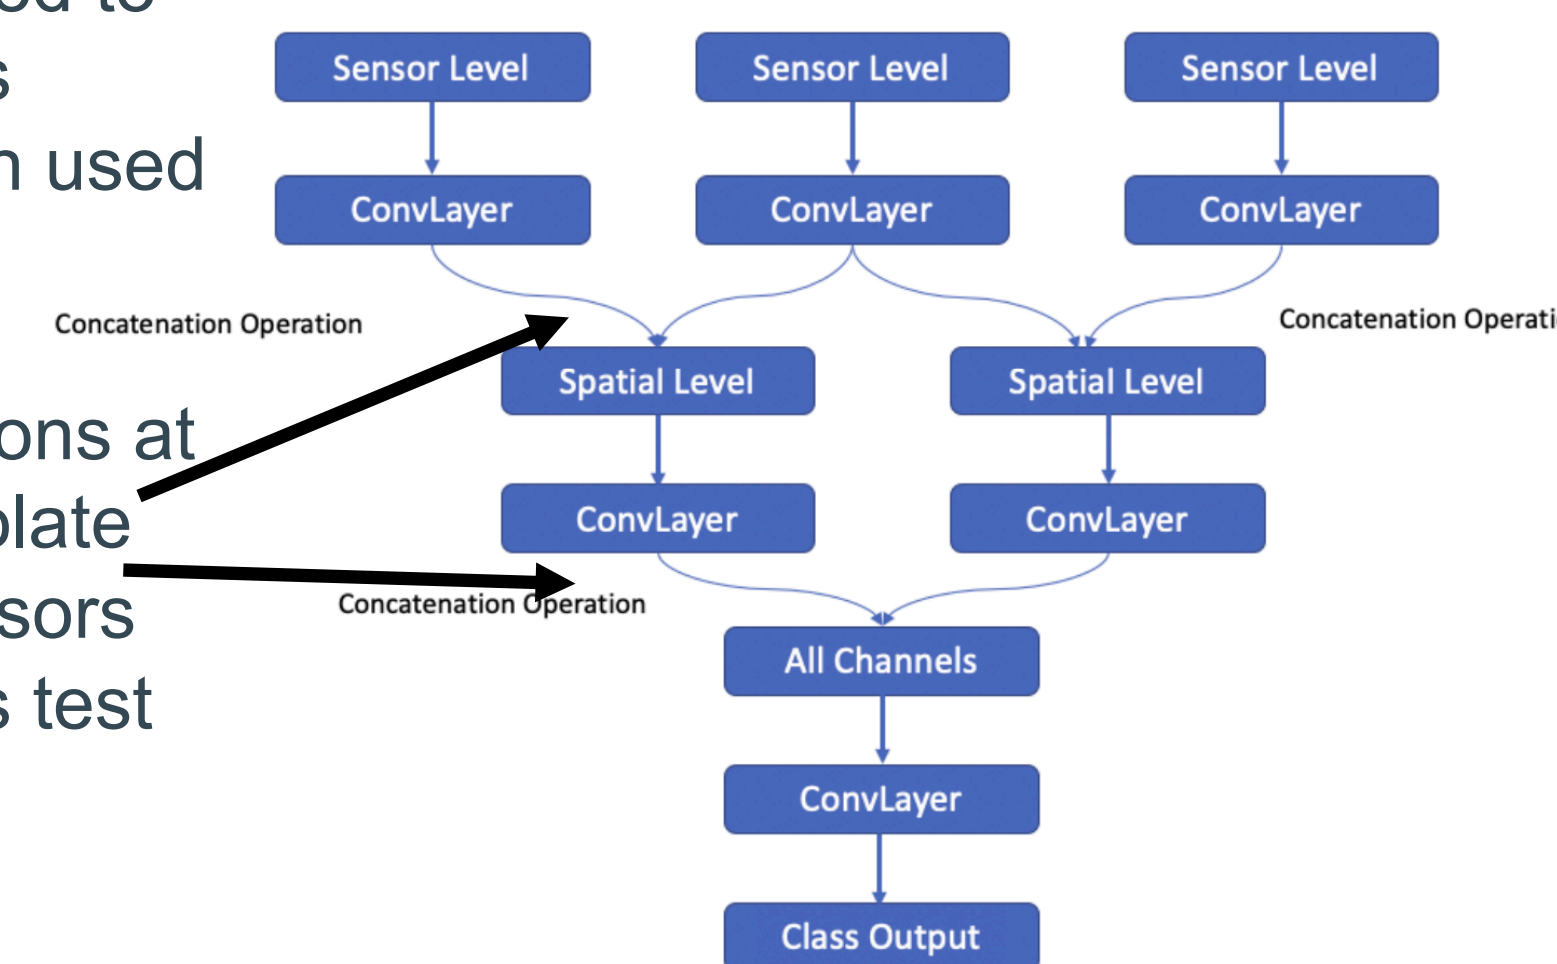

## ConvNet Performance

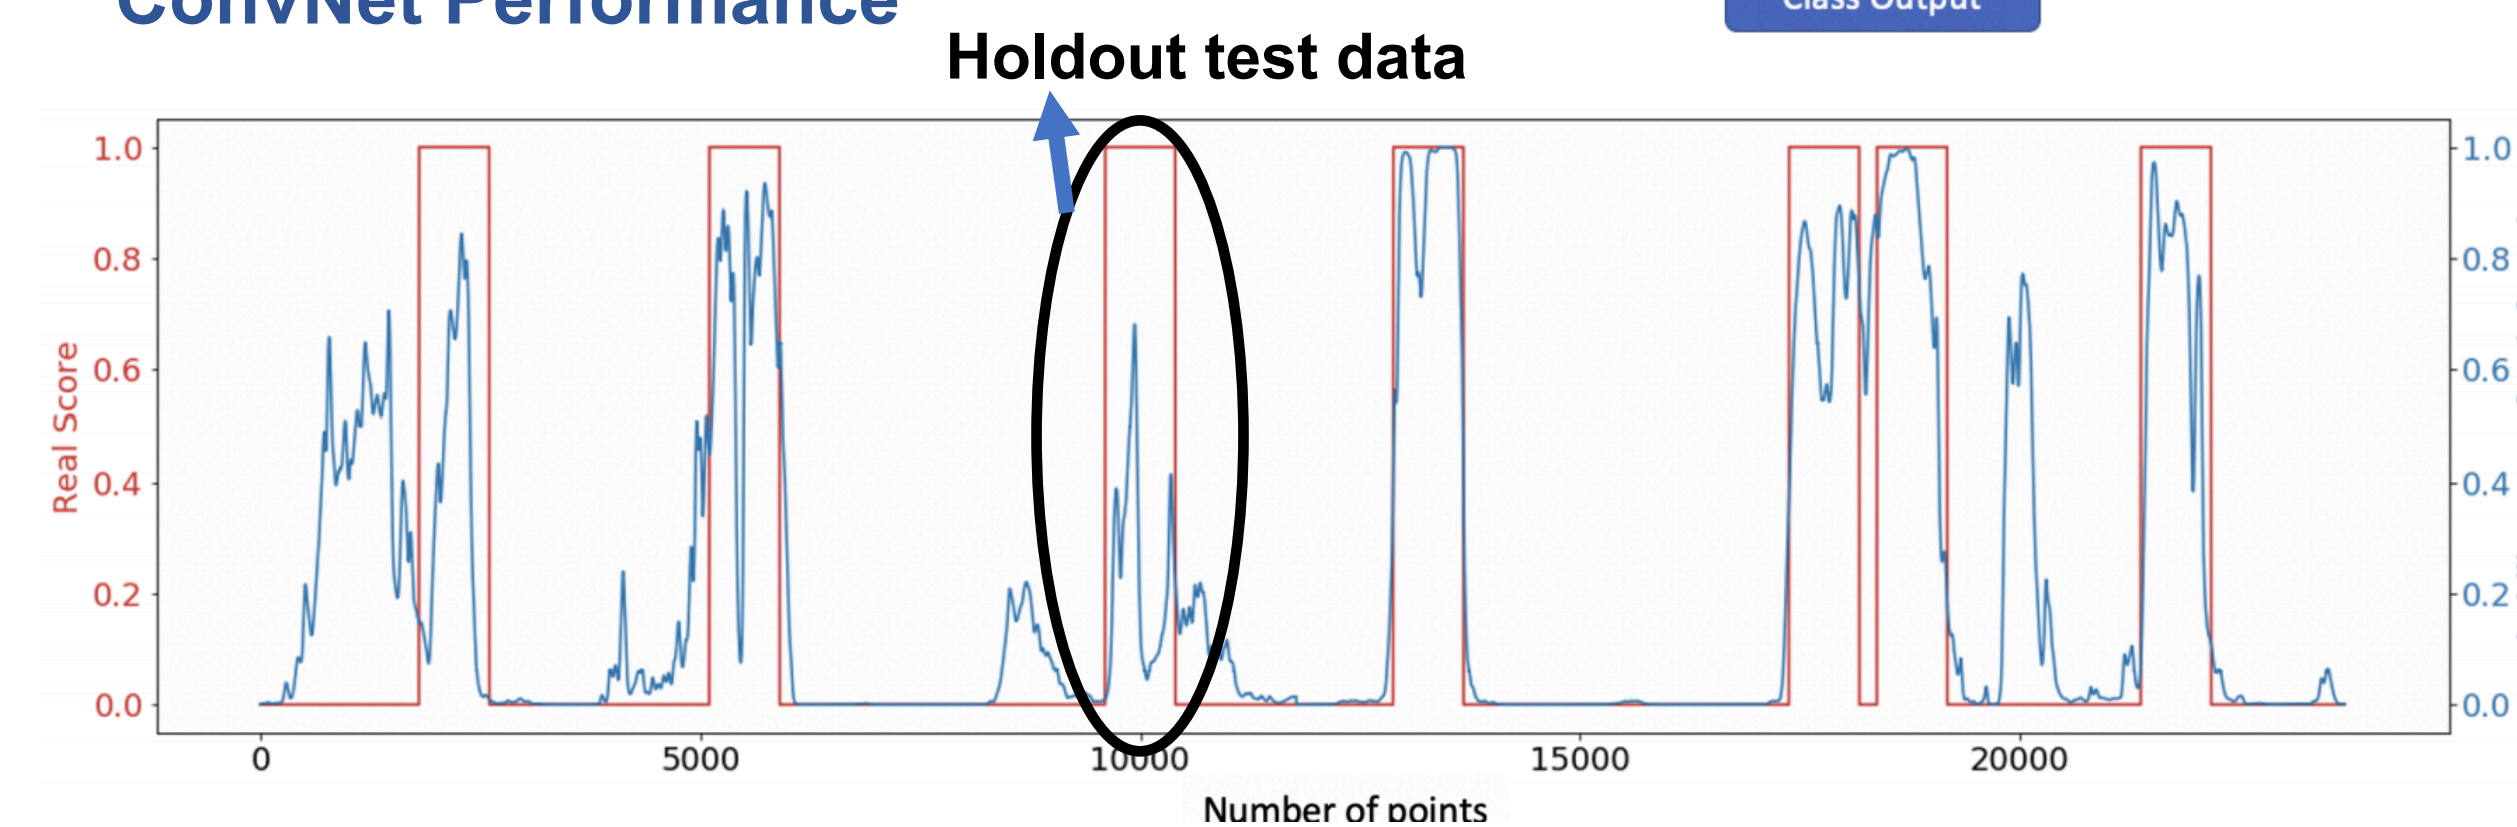

## TL;DR

- Robust multi-sensor data alignment using FastDTW achieved
- Point-based supervised/unsupervised learning methods identify defects successfully.
- Slower methods sped up using RAPIDS-AI cuML library
- Multi-output CNN techniques are useful tools for characterizing defects
- Feasibility for field data explored and suitable methods identified

## Off-shelf ML packages

### Unsupervised point methods [based on pyod library]

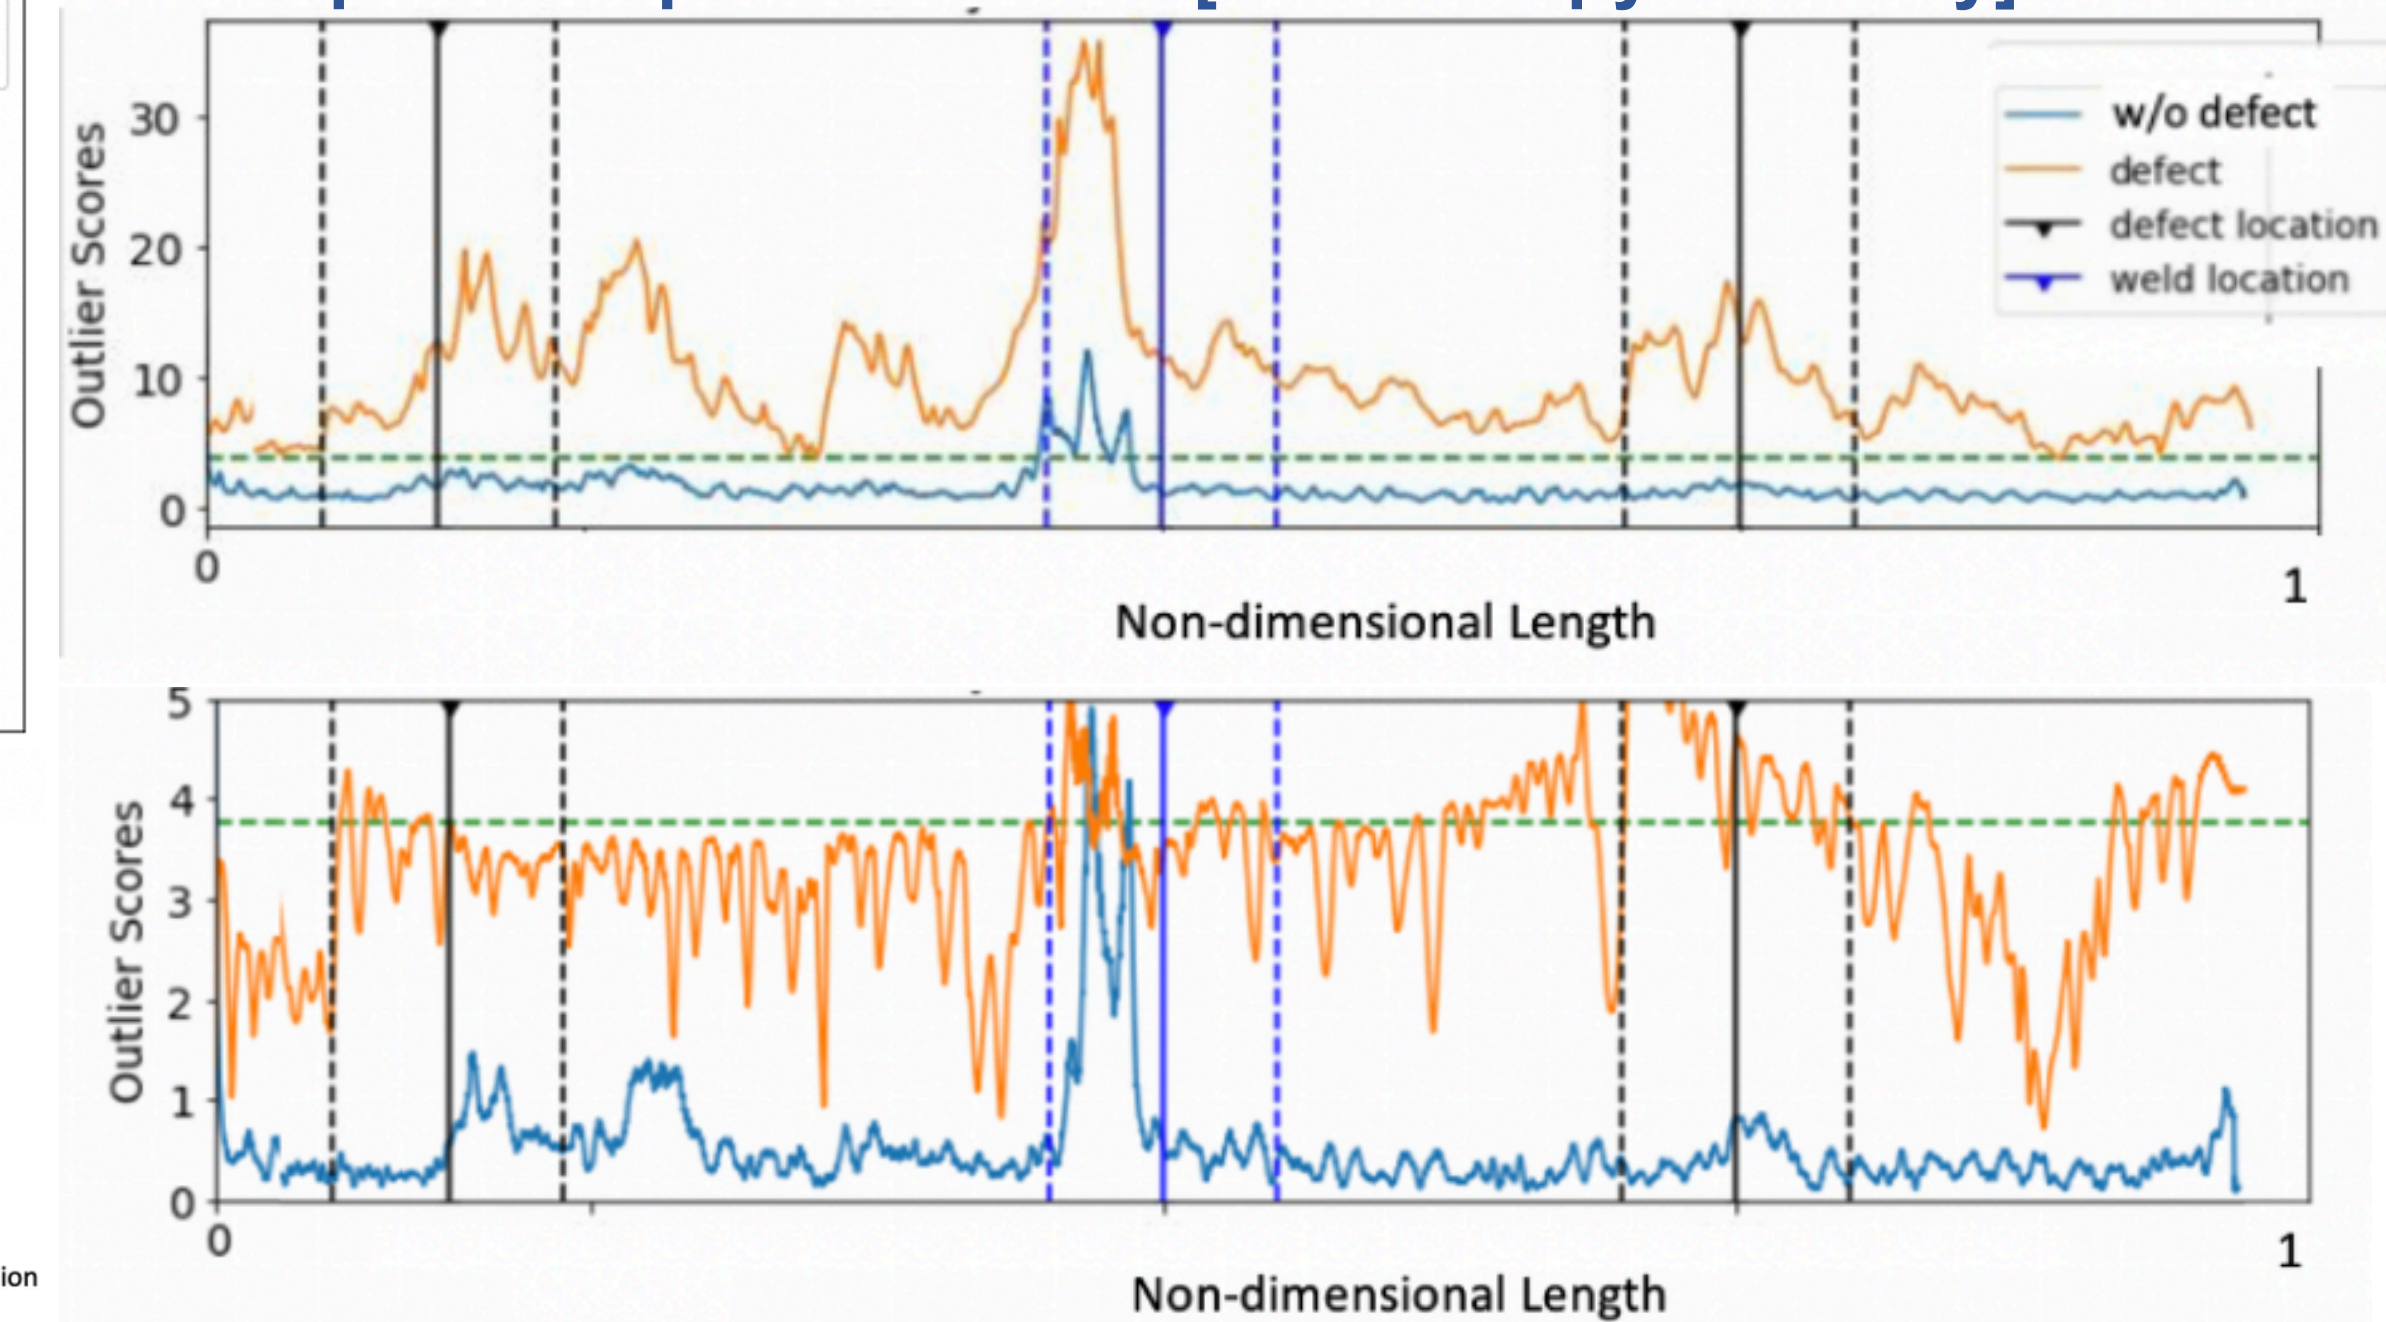

### Supervised point methods [based on scikit-learn library]

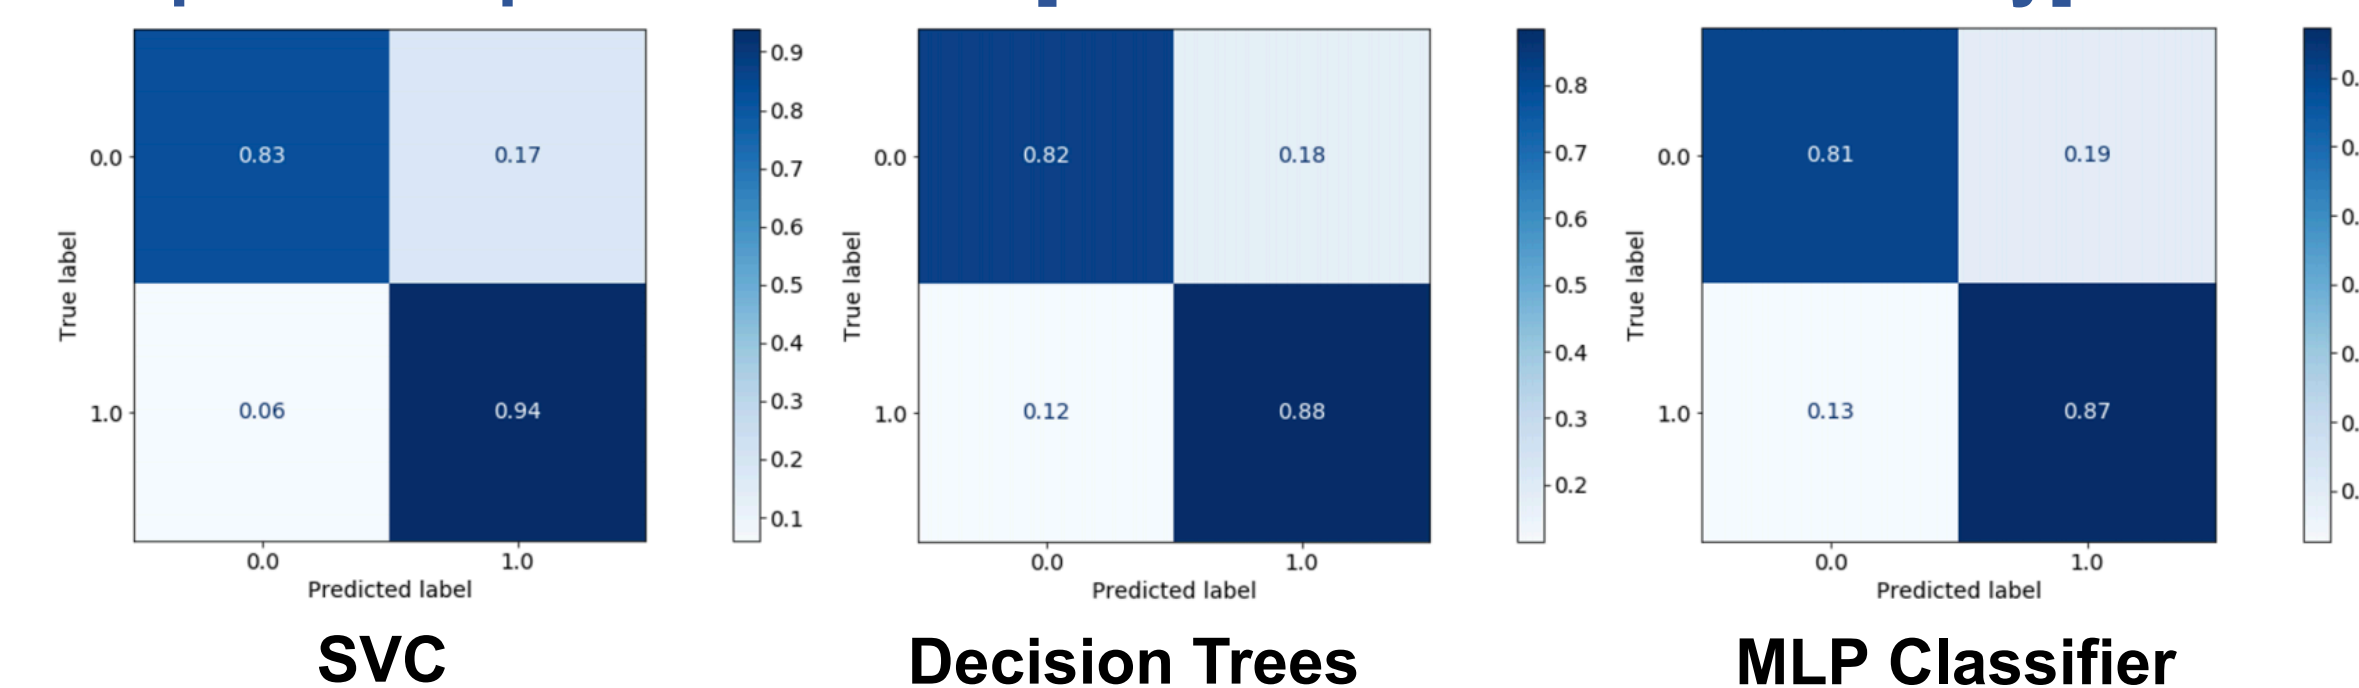

### Training time

- $N = 10000$  points
- All times in seconds
- SVC is slowest!

| Algorithm      | N    | 10*N | 100*N |
|----------------|------|------|-------|
| k-NN           | 1.47 | 11.2 | 140   |
| SVC [rbf]      | 8.76 | 751  | 18274 |
| Decision Trees | 0.33 | 3.86 | 131   |
| MLP Classifier | 7.9  | 69   | 772   |

### Speed up of SVC [RBF kernel] using RAPIDS-AI cuML library

| Data points | scikit-learn | RAPIDS-AI | Speed up |
|-------------|--------------|-----------|----------|
| 10000       | 8.76         | 2.90      | 3        |
| 100000      | 751          | 3.75      | 200      |
| 1000000     | 18274        | 98        | 186      |

### References

- Fabian Pedregosa, Gaël Varoquaux, Alexandre Gramfort, Vincent Michel, Bertrand Thirion, Olivier Grisel, Mathieu Blondel, Peter Prettenhofer, Ron Weiss, Vincent Dubourg, et al. Scikit-learn: Machine learning in python. *the Journal of machine Learning research*, 12:2825–2830, 2011.
- Yue Zhao, Zain Nasrullah, and Zheng Li. Pyod: A python toolbox for scalable outlier detection. *arXiv preprint arXiv:1901.01588*, 2019.

### Acknowledgements

Deepwater R&D team for steering and domain expertise, as well as HPC team at TOTAL E&P
